# Supplementary material for: Toxoplasma gondii is not an important contributor to poor reproductive performance of primiparous ewes from southern Australia: a prospective cohort study
Source: PubMed Central journal article supplement (PMC8933891; doi:10.1186/s12917-022-03211-w), 2022-03-19
Supplement: 12917_2022_3211_MOESM1_ESM.pdf [file 12917_2022_3211_MOESM1_ESM.pdf]

## Additional File 1

Individual animal and flock-level *T. gondii* seroprevalence values from seroprevalence surveys conducted across Australia between 1975 and 2021.

| Study                    | State(s) <sup>^</sup> | Individual animal seroprevalence n (%)           | Flock-level seroprevalence n (%) |
|--------------------------|-----------------------|--------------------------------------------------|----------------------------------|
| Munday [1]               | TAS                   | Lambs: 27/160 (16.9%)<br>Adults: 89/144 (61.7%)  |                                  |
| O'Donoghue et al. [2]    | SA                    | 86/ 1159 (7.4%)                                  | 27/59 (45.8%)                    |
| Plant et al. [3]         | NSW                   | 515/5724 (9%)                                    | 219/534 (41%)                    |
| Kiermeier et al. [4]     | NSW, VIC, QLD, SA, WA | Lambs: 37/246 (14.9%)<br>Adults: 126/388 (32.5%) |                                  |
| McGregor and Harvey [5]  | NSW                   | 33/489 (6.7%)                                    | 6/10 (60%)                       |
| Taggart et al. [6]       | SA                    | 318/560 (57%)                                    |                                  |
| Lanyon and O'Handley [7] | SA                    | 209/875 (23.9%)                                  | 28/29 (96.6%)                    |
| Hamilton et al. [8]      |                       | 46/401 (11.5%)                                   |                                  |

<sup>^</sup>NSW: New South Wales; QLD: Queensland; SA: South Australia; TAS: Tasmania; WA: Western Australia; VIC: Victoria.

### References cited:

1. Munday BL: **Prevalence of toxoplasmosis in Tasmanian meat animals.** *Aust Vet J* 1975, **51**(6):315-316.
2. O'Donoghue PJ, Riley MJ, Clarke JF: **Serological survey for *Toxoplasma* infections in sheep.** *Aust Vet J* 1987, **64**(2):40-45.
3. Plant JW, Freeman P, Saunders E: **Serological survey of the prevalence of *Toxoplasma gondii* antibodies in rams in sheep flocks in New South Wales.** *Aust Vet J* 1982, **59**(3):87-89.
4. Kiermeier A, Hamilton D, Smith G: **National serological baseline survey of *Toxoplasma gondii* in lambs and sheep.** Australia MaL; North Sydney: 2008: Available at: Accessed:
5. McGregor H, Harvey R: **A pilot survey of the prevalence of serum antibodies against *Toxoplasma gondii* and risk factors for transmission of *T. gondii* to sheep in the Tumbarumba shire of New South Wales Flock & Herd; 2011.** Available at: [<http://www.flockandherd.net.au/sheep/reader/toxoplasmosis.html>] Accessed: May 2018
6. Taggart P, McAllister M, Rutley D, Caraguel C: **Oesophageal sarcocystosis observed at slaughter provides a reliable and efficient proximate measure of *Toxoplasma gondii* seroprevalence in sheep.** *Aust Vet J* 2020, **98**(7):305-311.
7. Lanyon SR, O'Handley RM: **Relationship between *Toxoplasma gondii* seroprevalence and lamb marking in South Australian sheep flocks.** *Aust Vet J* 2020, **98**(11):525-528.
8. Hamilton D, Hodgson K, Howard A, Jolley J, Mahbub K, Torok V, McAllister M: **Investigation of the viability and national serological prevalence of *Toxoplasma gondii* in Australian sheep (Final Report V.MFS.0419).** Meat and Livestock Australia; North Sydney, Australia: 2021: Available at: [<https://www.mla.com.au/research-and-development/reports/2019/toxoplasma-gondii-sheep/#>] Accessed: September 2021
