# Supplementary material for: Toxoplasma gondii is not an important contributor to poor reproductive performance of primiparous ewes from southern Australia: a prospective cohort study
Source: PubMed Central journal article supplement (PMC8933891; doi:10.1186/s12917-022-03211-w), 2022-03-19
Supplement: 12917_2022_3211_MOESM2_ESM.pdf [file 12917_2022_3211_MOESM2_ESM.pdf]

## Additional File 2

Apparent *T. gondii* seropositivity with 95% confidence interval (95% CI) in primiparous ewes from Australian farms determined using indirect ELISA.

| Flock reference                          | Location            | Breed      | Tested ( <i>n</i> )         |             |             | <i>T. gondii</i> serology |
|------------------------------------------|---------------------|------------|-----------------------------|-------------|-------------|---------------------------|
|                                          |                     |            | Aborted or FTR <sup>c</sup> | Reared lamb | Total       | Seropositive <i>n</i> (%) |
| <b>YEARLINGS<sup>a</sup></b>             |                     |            |                             |             |             |                           |
| 1                                        | Kojonup, WA         | Merino     | 40                          | 0           | 40          | 0                         |
| 2                                        | Kojonup, WA         | Merino     | 40                          | 0           | 40          | 0                         |
| 5                                        | Korunya, SA         | Merino     | 40                          | 0           | 40          | 0                         |
| 6                                        | Bagot Well, SA      | Merino     | NA                          | NA          | 40*         | 1 (2.5%)                  |
| 9                                        | Watervale, SA       | Merino     | 30                          | 10          | 40          | 0                         |
| 10                                       | Broomehill, WA      | Merino     | 40                          | 0           | 40          | 2 (5%)                    |
| 12                                       | Tarlee, SA          | Merino     | 40                          | 0           | 40          | 1 (2.5%)                  |
| 13                                       | Giffard West, VIC   | Merino     | 40                          | 0           | 40          | 1 (2.5%)                  |
| 15                                       | Katanning, WA       | Merino     | 40                          | 0           | 40          | 1 (2.5%)                  |
| 26                                       | Culla, VIC          | Merino     | 40                          | 0           | 40          | 0                         |
| 29                                       | Ballarat, VIC       | Merino     | 30                          | 10          | 40          | 1 (2.5%)                  |
| <b>Seroprevalence % (95% CI)</b>         |                     |            | <b>380</b>                  | <b>20</b>   | <b>440</b>  | <b>1.59% (0.7, 3.1)</b>   |
| <b>EWE LAMBS<sup>b</sup></b>             |                     |            |                             |             |             |                           |
| 3 <sup>d</sup>                           | Narrogin, WA        | Non-Merino | 50                          | 48          | 98          | 1 (1%)                    |
| 4                                        | York, WA            | Non-Merino | 31                          | 9           | 40          | 0                         |
| 7                                        | Kojonup, WA         | Non-Merino | 26                          | 14          | 40          | 1 (2.5%)                  |
| 8                                        | Katanning, WA       | Merino     | 30                          | 10          | 40          | 0                         |
| 11                                       | Kojonup, WA         | Non-Merino | 35                          | 5           | 40          | 0                         |
| 14 <sup>d</sup>                          | Narrogin, WA        | Non-Merino | 40                          | 0           | 40          | 0                         |
| 16                                       | Ongerup, WA         | Non-Merino | 40                          | 0           | 40          | 0                         |
| 17                                       | Hamilton, VIC       | Non-Merino | 20                          | 20          | 40          | 0                         |
| 18                                       | Hamilton, VIC       | Non-Merino | 39                          | 1           | 40          | 0                         |
| 19 <sup>e</sup>                          | Nareen, VIC         | Non-Merino | 40                          | 0           | 40          | 0                         |
| 20                                       | Cashmore, VIC       | Non-Merino | 40                          | 0           | 40          | 2 (5%)                    |
| 21                                       | Coojar, VIC         | Non-Merino | 40                          | 0           | 40          | 1 (2.5%)                  |
| 22                                       | Mount Gambier, SA   | Non-Merino | 40                          | 0           | 40          | 1 (2.5%)                  |
| 23                                       | Kangaroo Island, SA | Non-Merino | 29                          | 11          | 40          | 0                         |
| 24                                       | Beachport, SA       | Non-Merino | 61                          | 0           | 61          | 1 (1.6%)                  |
| 25                                       | Sellicks Hill, SA   | Non-Merino | 40                          | 0           | 40          | 0                         |
| 27 <sup>e</sup>                          | Nareen, VIC         | Non-Merino | 37                          | 3           | 40          | 0                         |
| 28                                       | Inverleigh, VIC     | Non-Merino | 39                          | 1           | 40          | 0                         |
| 30                                       | Strathalbyn, SA     | Non-Merino | 40                          | 0           | 40          | 0                         |
| <b>Seropositivity % (95% CI)</b>         |                     |            | <b>717</b>                  | <b>122</b>  | <b>839</b>  | <b>0.83% (0.37, 1.63)</b> |
| <b>Overall seropositivity % (95% CI)</b> |                     |            | <b>1097</b>                 | <b>142</b>  | <b>1279</b> | <b>1.09% (0.63, 1.78)</b> |

<sup>a</sup> Primiparous ewes mated at approximately 18 months of age

<sup>b</sup> Primiparous ewes mated at approximately 8 months of age

<sup>c</sup> FTR: fail to rear (scanned pregnant with subsequent abortion or perinatal lamb mortality)

<sup>d</sup> Same property with Flock 3 sampled 2018 and Flock 14 sampled 2019

<sup>e</sup> Same property with Flock 19 sampled 2019 and Flock 27 sampled 2020

WA: Western Australia

SA: South Australia

VIC: Victoria

\*Reproductive outcome unknown
