# Supplementary material for: Toxoplasma gondii is not an important contributor to poor reproductive performance of primiparous ewes from southern Australia: a prospective cohort study
Source: PubMed Central journal article supplement (PMC8933891; doi:10.1186/s12917-022-03211-w), 2022-03-19
Supplement: 12917_2022_3211_MOESM3_ESM.pdf [file 12917_2022_3211_MOESM3_ESM.pdf]

## Additional File 3

Apparent *T. gondii* seropositivity for multiparous mature ewes (3 years of age or older) from Australian farms determined using indirect ELISA.

| Flock reference                                     | Location            | Age        | <i>T. gondii</i> serology |                              |
|-----------------------------------------------------|---------------------|------------|---------------------------|------------------------------|
|                                                     |                     |            | Tested<br><i>n</i>        | Seropositive<br><i>n</i> (%) |
| 1                                                   | Kojonup, WA         | 4-7years   | 20                        | 0                            |
| 2                                                   | Kojonup, WA         | 5 years    | 20                        | 0                            |
| 3 and 14 <sup>a</sup>                               | Narrogin, WA        | 5 years    | 20                        | 2 (10%)                      |
| 4                                                   | York, WA            | 5-6 years  | 20                        | 0                            |
| 5                                                   | Korunya, SA         | 5+ years   | 20                        | 0                            |
| 6                                                   | Bagot Well, SA      | 5+ years   | 20                        | 0                            |
| 7                                                   | Kojonup, WA         | 5-7 years  | 20                        | 2 (10%)                      |
| 8                                                   | Katanning, WA       | 4-6 years  | 20                        | 0                            |
| 9                                                   | Watervale, SA       | 5+ years   | 18                        | 0                            |
| 10                                                  | Broomehill, WA      | 5-10 years | 20                        | 0                            |
| 11                                                  | Kojonup, WA         | 5-6 years  | 20                        | 0                            |
| 12                                                  | Tarlee, SA          | 5+ years   | 20                        | 0                            |
| 13                                                  | Giffard West, VIC   | 5 years    | 20                        | 0                            |
| 15                                                  | Katanning, WA       | 5-7 years  | 20                        | 1 (5%)                       |
| 16                                                  | Ongerup, WA         | 4-7 years  | 20                        | 0                            |
| 17                                                  | Hamilton, VIC       | 4-5 years  | 20                        | 0                            |
| 18                                                  | Hamilton, VIC       | 6-7 years  | 20                        | 1 (5%)                       |
| 19 and 27 <sup>b</sup>                              | Nareen, VIC         | 5-8 years  | 20                        | 0                            |
| 20                                                  | Cashmore, VIC       | 4-8 years  | 20                        | 7 (35%)                      |
| 21                                                  | Coojar, VIC         | 4+ years   | 20                        | 0                            |
| 22                                                  | Mount Gambier, SA   | 3-9 years  | 20                        | 1 (5%)                       |
| 23                                                  | Kangaroo Island, SA | 4-7 years  | 20                        | 10 (50%)                     |
| 24                                                  | Beachport, SA       | 5+ years   | 20                        | 1 (5%)                       |
| 25                                                  | Sellicks Hill, SA   | 4-7 years  | 20                        | 5 (25%)                      |
| 26                                                  | Culla, VIC          | 4-9 years  | 20                        | 0                            |
| 28                                                  | Inverleigh, VIC     | 3-6 years  | 20                        | 6 (30%)                      |
| 29                                                  | Ballarat, VIC       | 4-9 years  | 20                        | 9 (45%)                      |
| 30                                                  | Strathalbyn, SA     | 5+ years   | 20                        | 0                            |
| <b>Seropositivity (% (95% confidence interval))</b> |                     |            | <b>558</b>                | <b>8.06% (6.02, 10.54)</b>   |

<sup>a</sup> Primiparous ewes from property sampled in 2018 (flock 3) & 2019 (flock 14) – mature ewes sampled in one year only

<sup>b</sup> Primiparous ewes from property sampled in 2019 (flock 19) & 2020 (flock 27) – mature ewes sampled in one year only

WA: Western Australia

SA: South Australia

VIC: Victoria
