# Supplementary material for: Toxoplasma gondii is not an important contributor to poor reproductive performance of primiparous ewes from southern Australia: a prospective cohort study
Source: PubMed Central journal article supplement (PMC8933891; doi:10.1186/s12917-022-03211-w), 2022-03-19
Supplement: 12917_2022_3211_MOESM5_ESM.pdf [file 12917_2022_3211_MOESM5_ESM.pdf]

## Additional File 5

### Validation of *T. gondii* indirect ELISA (ID Screen Toxoplasmosis Indirect Multi-species, IDvet) with modified agglutination test

The indirect ELISA (ID Screen Toxoplasmosis Indirect Multispecies, ID Vet, France) was validated in-house against a panel of 28 Australian sheep serum previously tested using the modified agglutination test (Toxo-Screen Direct Agglutination kit, BioMérieux, Marcy-l'Étoile France) [1]. Samples were analysed according to the manufacturer's instructions for both tests.

| Indirect ELISA (ID Screen) | Value (%) | 95% confidence interval |
|----------------------------|-----------|-------------------------|
| Sensitivity                | 90.5      | 71.1, 98.3              |
| Specificity                | 100       | 64.6, 100               |
| Positive Predictive Value  | 100       | 83.2, 100               |
| Negative Predictive Value  | 77.8      | 45.3, 96                |

#### References cited:

1. Hamilton D, Hodgson K, Howard A, Jolley J, Mahbub K, Torok V, McAllister M: **Investigation of the viability and national serological prevalence of *Toxoplasma gondii* in Australian sheep (Final Report V.MFS.0419)**. Meat and Livestock Australia; North Sydney, Australia: 2021: Available at: <https://www.mla.com.au/research-and-development/reports/2019/toxoplasma-gondii-sheep/#> Accessed: September 2021
