# Supplementary material for: Toxoplasma gondii is not an important contributor to poor reproductive performance of primiparous ewes from southern Australia: a prospective cohort study
Source: PubMed Central journal article supplement (PMC8933891; doi:10.1186/s12917-022-03211-w), 2022-03-19
Supplement: 12917_2022_3211_MOESM6_ESM.pdf [file 12917_2022_3211_MOESM6_ESM.pdf]

## Additional File 6

Serological status category for 'doubtful' samples re-tested for anti-*T. gondii* IgG with alternate indirect ELISA

| Sample ID               | Flock reference | Reproductive outcome             | ID-VET ELISA<br>Result (S/P value <sup>a</sup> ) | IDEXX ELISA<br>Result (S/P value <sup>a</sup> ) | Serological category |
|-------------------------|-----------------|----------------------------------|--------------------------------------------------|-------------------------------------------------|----------------------|
| <b>Primiparous ewes</b> |                 |                                  |                                                  |                                                 |                      |
| 3311                    | 2               | Perinatal loss                   | Doubtful (40.71)                                 | Negative (6.24)                                 | Negative             |
| 3387                    | 2               | Perinatal loss                   | Doubtful (41.50)                                 | Negative (11.84)                                | Negative             |
| 3548                    | 3               | Perinatal loss                   | Doubtful (40.88)                                 | Negative (5.21)                                 | Negative             |
| 2240*                   | 3               | Late abortion/<br>perinatal loss | Doubtful (46.51)                                 | Negative (3.90)                                 | Negative             |
| 2804*                   | 3               | Late abortion/<br>perinatal loss | Doubtful (49.93)                                 | Negative (9.41)                                 | Negative             |
| 15115                   | 6               | Unknown                          | Doubtful (41.45)                                 | Negative (3.56)                                 | Negative             |
| 16381                   | 7               | Late abortion/<br>perinatal loss | Doubtful (45.92)                                 | Negative (3.95)                                 | Negative             |
| 16474                   | 8               | Raised twins                     | Doubtful (43.43)                                 | Negative (4.24)                                 | Negative             |
| 16476                   | 8               | Perinatal loss                   | Doubtful (42.84)                                 | Negative (5.90)                                 | Negative             |
| 16827                   | 8               | Raised single                    | Doubtful (48.99)                                 | Negative (11.74)                                | Negative             |
| 17797                   | 12              | Perinatal loss                   | Doubtful (41.77)                                 | Negative (3.56)                                 | Negative             |
| 17870                   | 12              | Perinatal loss                   | Doubtful (46.29)                                 | Negative (3.02)                                 | Negative             |
| 11358*                  | 15              | Perinatal loss                   | Doubtful (43.21)                                 | Negative (2.19)                                 | Negative             |
| 15681*                  | 15              | Perinatal loss                   | Doubtful (42.55)                                 | Negative (2.68)                                 | Negative             |
| 18306                   | 17              | Perinatal loss                   | Doubtful (40.59)                                 | Negative (3.17)                                 | Negative             |
| 7302*                   | 20              | Perinatal loss                   | Doubtful (43.95)                                 | Negative (13.60)                                | Negative             |
| 12499*                  | 20              | Perinatal loss                   | Doubtful (45.61)                                 | Weak positive (33.67)                           | Positive             |
| 16178*                  | 20              | Perinatal loss                   | Doubtful (46.48)                                 | Weak positive (70.52)                           | Positive             |
| 17987                   | 21              | Perinatal loss                   | Doubtful (41.26)                                 | Negative (4.58)                                 | Negative             |
| 7688*                   | 21              | Perinatal loss                   | Doubtful (43.54)                                 | Negative (8.09)                                 | Negative             |
| 18201                   | 22              | Perinatal loss                   | Doubtful (46.08)                                 | Negative (5.95)                                 | Negative             |
| 21895                   | 24              | Aborted                          | Doubtful (47.50)                                 | Negative 0.88)                                  | Negative             |
| <b>Mature ewes</b>      |                 |                                  |                                                  |                                                 |                      |
| M140                    | 11              | Unknown                          | Doubtful (49.84)                                 | Negative (4.24)                                 | Negative             |
| M549                    | 22              | Unknown                          | Doubtful (46.34)                                 | Negative (2.92)                                 | Negative             |
| M552                    | 22              | Unknown                          | Doubtful (40.45)                                 | Negative (2.58)                                 | Negative             |
| M554                    | 22              | Unknown                          | Doubtful (43.92)                                 | Negative (2.10)                                 | Negative             |
| M555                    | 22              | Unknown                          | Doubtful (47.51)                                 | Negative (4.87)                                 | Negative             |
| M288                    | 24              | Unknown                          | Doubtful (46.71)                                 | Negative (9.84)                                 | Negative             |
| M304                    | 25              | Unknown                          | Doubtful (40.86)                                 | Negative (0.97)                                 | Negative             |
| M308                    | 25              | Unknown                          | Doubtful (46.09)                                 | Negative (1.95)                                 | Negative             |
| M466                    | 26              | Unknown                          | Doubtful (47.23)                                 | Negative (2.92)                                 | Negative             |
| M525                    | 29              | Unknown                          | Doubtful (44.63)                                 | Negative (14.33)                                | Negative             |
| M534                    | 29              | Unknown                          | Doubtful (45.61)                                 | Negative (12.33)                                | Negative             |

<sup>a</sup> S/P value: mean percentage of sample/positive ((OD<sub>sample</sub> - OD<sub>negative.control</sub>)/(OD<sub>positive control</sub> - OD<sub>negative.control</sub>))

\* Serial blood sample from timepoint prior to lamb marking tested to determine timing of seroconversion
