# Supplementary material for: Toxoplasma gondii is not an important contributor to poor reproductive performance of primiparous ewes from southern Australia: a prospective cohort study
Source: PubMed Central journal article supplement (PMC8933891; doi:10.1186/s12917-022-03211-w), 2022-03-19
Supplement: 12917_2022_3211_MOESM7_ESM.pdf [file 12917_2022_3211_MOESM7_ESM.pdf]

## Additional File 7

Serological status category for subset of 'negative' samples (ID Screen Toxoplasmosis Indirect Multi-species, IDvet) re-tested for anti-*T. gondii* IgG with alternate indirect ELISA (IDEXX Toxotest, IDEXX)

| Sample ID | Flock reference | Reproductive outcome          | ID-VET ELISA Result | IDEXX ELISA Result |
|-----------|-----------------|-------------------------------|---------------------|--------------------|
| 3056      | 1               | Perinatal loss                | Negative            | Negative           |
| 3057      | 1               | Perinatal loss                | Negative            | Negative           |
| 3067      | 1               | Perinatal loss                | Negative            | Negative           |
| 3108      | 1               | Perinatal death + ewe death   | Negative            | Negative           |
| 3111      | 1               | Late abortion/ perinatal loss | Negative            | Negative           |
| 3347      | 2               | Perinatal loss                | Negative            | Negative           |
| 3348      | 2               | Perinatal loss                | Negative            | Negative           |
| 3350      | 2               | Perinatal loss                | Negative            | Negative           |
| 3351      | 2               | Perinatal loss                | Negative            | Negative           |
| 3358      | 2               | Perinatal loss                | Negative            | Negative           |
| 3426      | 3               | Not pregnant at scanning      | Negative            | Negative           |
| 3427      | 3               | Reared lamb                   | Negative            | Negative           |
| 3429      | 3               | Abortion                      | Negative            | Negative           |
| 3431      | 3               | Perinatal loss                | Negative            | Negative           |
| 3432      | 3               | Suspect perinatal loss        | Negative            | Negative           |
| 2964      | 4               | Perinatal loss                | Negative            | Negative           |
| 2995      | 4               | Perinatal loss                | Negative            | Negative           |
| 2998      | 4               | Perinatal loss                | Negative            | Negative           |
| 3605      | 4               | Perinatal loss                | Negative            | Negative           |
| 3614      | 4               | Perinatal loss                | Negative            | Negative           |
